# Supplementary material for: Growth Optimisation and Kinetic Profiling of Diesel Biodegradation by a Cold-Adapted Microbial Consortium Isolated from Trinity Peninsula, Antarctica
Source: MDPI journal article supplement (doi:10.3390/biology10060493), 2021-06-02
Supplement: s1 [file s1]

## Supplementary data

### S1: One-way analysis of variance for primary screening of 28 soil consortia

| one-way ANOVA and<br>post-hoc Dunnett test | Mean<br>Difference | q      | p value | Significance |
|--------------------------------------------|--------------------|--------|---------|--------------|
| CONTROL vs BS1                             | -32.206            | 8.085  | p<0.01  | **           |
| CONTROL vs BS2                             | -39.973            | 10.035 | p<0.01  | **           |
| CONTROL vs BS3                             | -39.682            | 9.962  | p<0.01  | **           |
| CONTROL vs BS4                             | -48.614            | 12.205 | p<0.01  | **           |
| CONTROL vs BS5                             | -47.837            | 12.01  | p<0.01  | **           |
| CONTROL vs BS6                             | -27.546            | 6.915  | p<0.01  | **           |
| CONTROL vs BS7                             | -56.866            | 14.276 | p<0.01  | **           |
| CONTROL vs BS8                             | -35.604            | 8.938  | p<0.01  | **           |
| CONTROL vs BS9                             | -66.866            | 16.787 | p<0.001 | ***          |
| CONTROL vs BS10                            | -20.168            | 5.063  | p<0.01  | **           |
| CONTROL vs BS11                            | -43.663            | 10.962 | p<0.01  | **           |
| CONTROL vs BS12                            | -41.332            | 10.377 | p<0.01  | **           |
| CONTROL vs BS13                            | -42.983            | 10.791 | p<0.01  | **           |
| CONTROL vs BS14                            | -13.177            | 3.308  | p<0.05  | *            |
| CONTROL vs BS15a                           | -64.731            | 16.251 | p<0.001 | ***          |
| CONTROL vs BS15b                           | -69.973            | 17.567 | p<0.001 | ***          |
| CONTROL vs BS16                            | -12.303            | 3.089  | p<0.05  | *            |
| CONTROL vs BS17                            | -2.982             | 0.7486 | p>0.05  | ns           |
| CONTROL vs BS19                            | -19.488            | 4.892  | p<0.01  | **           |
| CONTROL vs BS20                            | -47.546            | 11.936 | p<0.01  | **           |
| CONTROL vs BS21                            | -16.851            | 4.23   | p<0.01  | **           |
| CONTROL vs BS22                            | -47.352            | 11.888 | p<0.01  | **           |
| CONTROL vs BS23                            | -73.08             | 18.347 | p<0.001 | ***          |
| CONTROL vs BS24                            | -74.926            | 18.81  | p<0.001 | ***          |
| CONTROL vs BS25                            | -13.274            | 3.332  | p<0.05  | *            |
| CONTROL vs BS26                            | -73.954            | 18.313 | p<0.001 | ***          |
| CONTROL vs BS27                            | -58.905            | 14.586 | p<0.01  | **           |
| CONTROL vs BS28                            | -56.478            | 13.985 | p<0.01  | **           |

One-way ANOVA with post-hoc Dunnett's test (group vs control) implemented to shortlist the consortium with diesel biodegradation potential. Only samples with p<0.001 were selected for secondary screening at 2% v/v diesel concentration.

**S2: One-way analysis of variance for secondary screening of six shortlisted soil consortia**

| TPH degradation (%)                        |                    |        |         |              |
|--------------------------------------------|--------------------|--------|---------|--------------|
| one-way ANOVA and<br>post-hoc Tukey's test | Mean<br>Difference | q      | p value | Significance |
| BS9 vs BS15a                               | 5.236              | 3.368  | P>0.05  | ns           |
| BS9 vs BS15b                               | 21.278             | 13.688 | P<0.001 | ***          |
| BS9 vs BS23                                | -0.336             | 0.2162 | P>0.05  | ns           |
| BS9 vs BS24                                | -3.170             | 2.039  | P>0.05  | ns           |
| BS9 vs BS26                                | 29.107             | 18.725 | P<0.001 | ***          |
| BS15a vs BS15b                             | 16.042             | 10.32  | P<0.001 | ***          |
| BS15a vs BS23                              | -5.572             | 3.584  | P>0.05  | ns           |
| BS15a vs BS24                              | -8.405             | 5.407  | P<0.05  | *            |
| BS15a vs BS26                              | 23.871             | 15.357 | P<0.001 | ***          |
| BS15b vs BS23                              | -21.614            | 13.905 | P<0.001 | ***          |
| BS15b vs BS24                              | -24.448            | 15.728 | P<0.001 | ***          |
| BS15b vs BS26                              | 7.829              | 5.036  | P<0.05  | *            |
| BS23 vs BS24                               | -2.834             | 1.823  | P>0.05  | ns           |
| BS23 vs BS26                               | 29.443             | 18.941 | P<0.001 | ***          |
| BS24 vs BS26                               | 32.277             | 20.764 | P<0.001 | ***          |

\*p < 0.05, \*\* p < 0.01, \*\*\* p < 0.001.

| Microbial growth (OD <sub>600 nm</sub> )   |                    |        |         |              |
|--------------------------------------------|--------------------|--------|---------|--------------|
| one-way ANOVA and<br>post-hoc Tukey's test | Mean<br>Difference | q      | p value | Significance |
| BS9 vs BS15a                               | 0.2820             | 35.184 | P<0.001 | ***          |
| BS9 vs BS15b                               | 0.4217             | 52.609 | P<0.001 | ***          |
| BS9 vs BS23                                | 0.1823             | 22.749 | P<0.001 | ***          |
| BS9 vs BS24                                | -0.2797            | 34.893 | P<0.001 | ***          |
| BS9 vs BS26                                | 0.4903             | 61.177 | P<0.001 | ***          |
| BS15a vs BS15b                             | 0.1397             | 17.426 | P<0.001 | ***          |
| BS15a vs BS23                              | -0.0997            | 12.435 | P<0.001 | ***          |
| BS15a vs BS24                              | -0.5617            | 70.077 | P<0.001 | ***          |
| BS15a vs BS26                              | 0.2083             | 25.993 | P<0.001 | ***          |
| BS15b vs BS23                              | -0.2393            | 29.861 | P<0.001 | ***          |
| BS15b vs BS24                              | -0.7013            | 87.502 | P<0.001 | ***          |
| BS15b vs BS26                              | 0.0687             | 8.567  | P<0.001 | ***          |
| BS23 vs BS24                               | -0.4620            | 57.642 | P<0.001 | ***          |
| BS23 vs BS26                               | 0.3080             | 38.428 | P<0.001 | ***          |
| BS24 vs BS26                               | 0.7700             | 96.069 | P<0.001 | ***          |

\*p < 0.05, \*\* p < 0.01, \*\*\* p < 0.001.

BS24 performed slightly better than the others in terms of microbial growth as verified through one-way ANOVA with post-hoc Tukey's test (multiple groups comparison). The authors proceed with BS24 although BS9, BS15a and BS23 were similarly weighted in terms of TPH degradation.

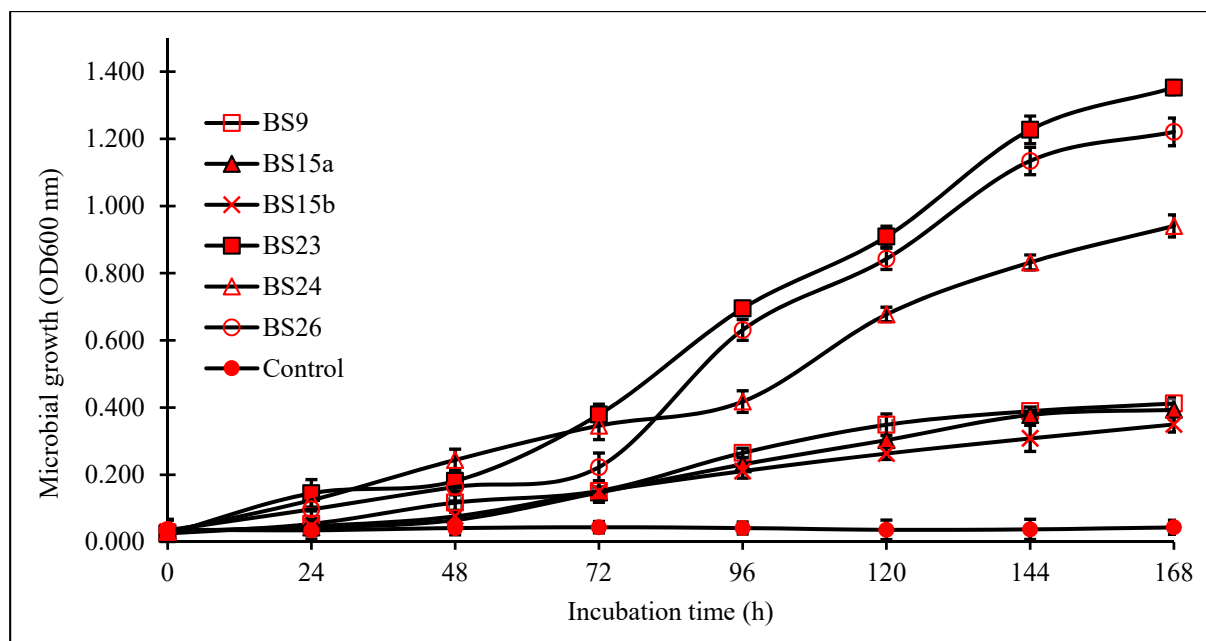

**S3:** The growth curves of six selected soil consortia over 7 d incubation time. Error bars represent the mean  $\pm$  standard deviation for experimental triplicates.
